1 **Modern contraceptive Use and its associated factors among married women**  
2 **in Senegal: Based on the recent National Demographic and Health Survey**  
3 **Data**

4 Bezawit Mulat <sup>1\*</sup>, Menen Tsegaw <sup>3</sup>, Kegnie Shitu <sup>2</sup>

5 <sup>1</sup>Department of Human Physiology, School of Medicine, College of Medicine and Health  
6 Sciences, University of Gondar, Gondar, Ethiopia

7 <sup>2</sup>Department of Health Education and Behavioral Sciences, Institute of Public Health, College of  
8 Medicine and Health Sciences, University of Gondar, Gondar, Ethiopia

9 <sup>3</sup>Department of Public Health, College of Medicine and Health Sciences, Ambo University,  
10 Ambo, Ethiopia

11

12 **\*Corresponding Author**

13 Bezawit Mulat

14 E-mail: [mulatbezawit@gmail.com](mailto:mulatbezawit@gmail.com)

15 Cell Phone: +251963729635

16

17

18

19

## 20 **Abstract**

### 21 **Objective**

22 This study aimed to assess the prevalence and associated factors of modern contraceptive use  
23 among married women in Senegal.

### 24 **Method**

25 The most recent Demographic and Health Survey (DHS), which was conducted in 2019 in  
26 Senegal was used. For this study 5,659 women were included. Multivariable binary Logistic  
27 regression analysis was used to identify factors associated with women's contraceptive use.

### 28 **Result**

29 According to the study, 25.5% (95%CI (24.4, 26.7)) of married women in Senegal uses modern  
30 contraceptive methods. Being currently working (AOR=1.27, 95% CI (1.11, 1.46)), husband  
31 educational level (primary educational level (AOR=1.32 ,95% CI (1.07,1.61), higher  
32 educational levels (AOR= 1.83 , 95% CI (1.32, 2.54)), wealth index (middle ( AOR=1.37,95%  
33 CI (1.15,1.63) and rich (AOR=1.34,95% CI (1.11,1.62)), exposure to family planning messages  
34 (AOR=1.29,95% CI (1.13,1.48)), having ANC visits( AOR=2.01, 95% CI(1.13,3.57)) and not  
35 wanting a child (AOR=2.35, 95%CI (1.90,2.95)) were positively and significantly with women's  
36 contraceptives use. On the other hand, number of children (having no child (AOR=0.03, 95% CI  
37 (0.01,0.06)), 1-2 children (AOR=0.47,95% CI(0.38,0.59) and 3-4 children ( AOR=0.79, 95%  
38 CI(0.67,0.96)), women who thought  $\geq 5$  children are ideal ( AOR=0.73,95% CI(0.61,0.88)) , and

39 had a desire for more children after 2 years (AOR=2.19, 95% CI(1.82,2.64) were negatively and  
40 significantly with women's contraceptives use.

41 **Conclusion:** contraceptive utilization was low among married women in Senegal. Women's  
42 contraceptive use was affected by family planning messages exposure, sociodemographic, and  
43 obstetric factors. Thus, a tailored behavior change intervention is required to increase  
44 contraceptive utilization among married women in Senegal.

45 **Key words: Modern contraceptive use, Married women, Senegal**

46

#### **Strengths and limitations of this study**

- The inclusion of nationally representative data and a large sample size, which strengthened the generalizability of the findings, was the study's key strength.
- Sample weighing was employed to compensate unequal sample allocations and non-responses.
- It may not be possible to establish causal links due to the cross-sectional nature of the data.
- It's possible that crucial factors that influence women's use of modern contraceptives might be neglected because the study relied on secondary data.

47

48

49

## 50 **Introduction**

51 Contraception today includes a variety of options: oral contraceptive pills, implants, injectable,  
52 contraceptive patch and vaginal ring, intrauterine device (IDU), female and male condoms,  
53 female and male sterilization, vaginal barrier methods (including the diaphragm, cervical cap and  
54 spermicidal agents), lactational amenorrhea method (LAM), emergency contraception pills,  
55 standard days method (SDM), basal body temperature (BBT) method, Two-day method and  
56 sympto-thermal method (1). Modern contraceptive use is characterized as a person's or couple's  
57 ability to have as many children as they want, when they want and has been found to lower  
58 mother and child morbidity and death (2,3).

59 The use of modern contraceptives is critical for achieving SDG 3's goal 3.7, which states that by  
60 2030, everyone in the world would have access to sexual and reproductive health care (4).  
61 Furthermore, in 1987, the Safe Motherhood Initiative established family planning as one of four  
62 pillars, alongside prenatal care, safe delivery, and postnatal care, to reduce maternal mortality in  
63 developing countries, where 99 percent of all maternal deaths occur (5).

64 According to the World Health Organization (WHO) report, nearly 308 million unwanted  
65 pregnancies were averted in 2017 (6). The increased use of contraceptive techniques has resulted  
66 in gains in not only health-related outcomes such as reduced maternal and newborn mortality,  
67 but also in educational and economic outcomes, particularly for girls and women (3,7) .

68 In Africa the use of modern contraceptive varies across different countries. For instance, it is  
69 62% in Zimbabwe, 6% in Guinea, 56%, Malawi and 56 % Kenya (8). Different studies stated  
70 that age , educational attainment of a woman , educational attainment of husbands , residence,  
71 wealth index of women, number of living children, having antenatal care visits (ANC), desire to  
72 space and want no more child are factors which have significant association with modern  
73 contraceptive utilization (8–10). Because of the large unmet need for contraception in Sub-  
74 Saharan African countries, the number of unplanned pregnancies is higher, estimated to be over  
75 14 million per year (11). According to reports, 31% of conceptions in Senegal are unintentional,  
76 with 24 percent of all unwanted pregnancies ending in induced abortions, 60% in unplanned  
77 births, and 16% in miscarriages (12) . All the aforementioned adverse outcomes would be  
78 prevented using contraceptives. However, there is a scarcity of data on the prevalence and  
79 associated aspects of modern contraception use in Senegal. As a result, the goal of this study is to  
80 determine the prevalence of modern contraceptive use and the factors that influence it among  
81 married women in Senegal.

## 82 **Methods**

### 83 **Study setting, data source, and study design**

84 Senegal is a West African country that borders the North Atlantic Ocean to the west. It is  
85 bordered on the north by Mauritania along the Senegal River, on the east by Mali, on the south  
86 by Guinea and Guinea-Bissau, and on the west by Mauritania along the Gambia River (13).  
87 Currently the population of the Senegal is estimated that 17,340,913 (14).

88 This analysis employed based on the data from the 2019 Continuous-Demographic and Health  
89 Survey (C-DHS) of Senegal .The C-DHS is a nationally representative data set developed by the

90 Senegalese Agency of Statistics and Demography (ANSD) and the survey lasts from April 2019  
91 - December 2019. The research participants are chosen using a two-stage stratified sampling  
92 technique. This data set (IR file) is consist of information collected from all eligible women aged  
93 15-49 years and the current study excludes unmarried women and employed with a total  
94 weighted sample of 5,659 married reproductive age women. An authorization letter for the use of  
95 this data was obtained from DHS program and the dataset was downloaded from DHS website  
96 [www.measuredhs.com](http://www.measuredhs.com)

## 97 **Study variables**

### 98 **Dependent variable**

99 The study's outcome variable was the use of modern contraceptive methods among married  
100 reproductive age women in Senegal. The variable was catigorized into two categories: 1 = “Use  
101 modern contraceptive” and 0 =”did not use modern contraceptive”.

### 102 **Independent variables**

103 In this study the independent variables included: sociodemographic factors (Age, religion,  
104 residence, educational status of women, educational status of husband, and current working  
105 (employment) status, wealth index, media exposure to family planning methods and obstetric  
106 factors: complications during previous pregnancies (terminated pregnancy), presence of  
107 antenatal care visits, number of living children, ideal number of children that the family want and  
108 desire for more children.

109 **Data processing and Analysis**

110 Individual records (IR) files were used to extract data, which was then coded and transformed  
111 using STATA version 14 statistical software. To account for differential chance of selection and  
112 non-response in the original survey, weighted samples were used for analysis. The presence of  
113 statistical significance was determined using a multivariable logistic regression analysis. It was  
114 fitted after the model's fitness was evaluated using the Hosmer and Lemeshow goodness of fit  
115 test. The variance inflation factor (VIF) was also used to analyze multicollinearity across the  
116 explanatory components, and it was found to be within acceptable range (1-5)(15). A p-value  
117 less than 0.05 is used to evaluate the presence of a meaningful effect or relationship of  
118 independent factors with the outcome variable.

119 **Patient public involvement**

120 The public was not involved in the design or conduct, choice of outcome measures and  
121 recruitment of the study.

122 **Result**

123 A total of 5,659 married women were included in the study. The mean age of the participants  
124 was 31 ( $\pm$  8.5) years with an age range of 15-49 years. The majority (98.2%) of the mothers were  
125 Muslims and 3357 (59.3 %) were from a rural area. Concerning the reproductive history (98.6%)  
126 of women have ANC visits (table 1).

127 Table 1 Sociodemographic and reproductive characteristics of married women in Senegal (n =  
128 5,659).

| Variable | Category | Frequency | Percent |
|----------|----------|-----------|---------|
|----------|----------|-----------|---------|

|                                                |                       |       |      |
|------------------------------------------------|-----------------------|-------|------|
| Age (in years)                                 | 15-24                 | 1,340 | 23.7 |
|                                                | 25-34                 | 2,216 | 39.2 |
|                                                | 35-49                 | 2,103 | 37.1 |
| Residence                                      | Rural                 | 3,357 | 59.3 |
|                                                | Urban                 | 2,302 | 40.7 |
| Religion                                       | Muslim                | 5,556 | 98.2 |
|                                                | Christian             | 103   | 1.8  |
| Educational status of respondents              | No formal education   | 3,443 | 60.8 |
|                                                | Primary               | 1,177 | 20.8 |
|                                                | Secondary             | 857   | 15.2 |
|                                                | Higher                | 182   | 3.2  |
| Educational status of the husband/partner      | No formal education   | 3,615 | 63.9 |
|                                                | Primary               | 640   | 11.3 |
|                                                | Secondary             | 635   | 11.2 |
|                                                | Higher                | 330   | 5.8  |
|                                                | Don't know            | 439   | 7.8  |
| Wealth index                                   | Poor                  | 2,298 | 40.6 |
|                                                | Middle                | 1,103 | 19.5 |
|                                                | Rich                  | 2,258 | 39.9 |
| Current working status                         | Currently working     | 2,904 | 51.3 |
|                                                | Currently not working | 2,755 | 48.7 |
| Mass media exposure to family planning methods | Have exposure         | 3,375 | 59.6 |
|                                                | Haven't exposure      | 2,284 | 40.4 |
| Ideal number of children                       | ≤4                    | 1,190 | 21.0 |
|                                                | ≥5                    | 3,364 | 59.5 |
|                                                | Non-numeric response  | 1,105 | 19.5 |
| Desire for more children                       | Wants within 2 years  | 1,602 | 28.3 |
|                                                | Wants after 2 years   | 2,450 | 43.3 |
|                                                | Wants, unsure timing  | 325   | 5.7  |
|                                                | Undecided             | 84    | 1.5  |
| Number of living children                      | Doesn't want          | 1,198 | 21.2 |
|                                                | No child              | 718   | 12.7 |
|                                                | 1-2 children          | 1,922 | 34.0 |



|                                               |                    |       |      |
|-----------------------------------------------|--------------------|-------|------|
|                                               | 3-4 children       | 1,485 | 26.2 |
| Have ANC visit                                | 5 or more children | 1,534 | 27.1 |
|                                               | Yes                | 5,578 | 98.6 |
|                                               | No                 | 81    | 1.4  |
| Ever had terminated pregnancy                 | Yes                | 1,200 | 20.2 |
|                                               | No                 | 4,733 | 79.8 |
| Decision maker for using modern contraceptive | Women              | 295   | 20.4 |
|                                               | Husband            | 240   | 16.6 |
|                                               | Joint decision     | 893   | 62.0 |
|                                               | Other              | 16    | 1.0  |

129

### 130 **Modern contraceptive use among married women**

131 In this study the prevalence of modern contraceptive use among married women in Senegal was  
 132 25.5% with (95% CI (24.4, 26.7)). The use of modern contraceptive method is higher among  
 133 age group of 25-34 as compared to age group of women 15-24. Additionally, the utilization of  
 134 modern contraceptives was higher (30.5%) among women who are currently working.  
 135 Furthermore, women who are exposed to family planning methods through the media are more  
 136 likely to use modern contraception (29.5%).

### 137 **Factors associated with modern contraceptive use**

138 Based on the output of multivariable binary logistic regression analysis, the following  
 139 explanatory variables had a statistically significant association with modern contraceptive use :  
 140 current working status of women (currently working (AOR=1.27, 95% CI (1.11, 1.46))), Husband  
 141 education (husbands who attended primary educational level (AOR=1.32 ,95% CI (1.07,1.61),  
 142 husbands who attended higher educational levels (AOR= 1.83 , 95% CI (1.32, 2.54), women  
 143 whose wealth index in middle( AOR=1.37,95% CI (1.15,1.63) and rich (AOR=1.34,95% CI

144 (1.11,1.62), women who had exposed to family planning methods through different medias  
145 (AOR=1.29,95% CI (1.13,1.48)), women who had ANC visits( AOR=2.01, 95% CI(1.13,3.57)).  
146 Plus to the above factors, women who had no child (AOR=0.03, 95% CI (0.01,0.06)), 1-2  
147 children (AOR=0.47,95% CI(0.38,0.59) and 3-4 children ( AOR=0.79, 95% CI(0.67,0.96)),  
148 women who thought  $\geq 5$  children are ideal( AOR=0.73,95% CI(0.61,0.88)) , and women who had  
149 a desire for more children after 2 years (AOR=2.19, 95% CI(1.82,2.64) and women who doesn't  
150 want a child (AOR=2.35, 95%CI (1.90,2.95)) were significantly associated with womens modern  
151 contraceptive use.

152 The odds of using modern contraceptive was increased by 27% among women who were  
153 currently working than their counterparts. The odds of using modern contraceptives was  
154 increased by 32% among women whose husband had primary level of education. Moreover,  
155 having a husband with primary and higher education level increased the odds of using modern  
156 contraceptive by 32% and 16% respectively, when compared to women having an illiterate  
157 husband. The odds of using modern contraceptives was increased by 29% among women who  
158 had exposure to family planning methods through different Medias (Table 2).

159 Table 2 Factors associated with modern contraceptive use among married women in Senegal  
160 (n=5,659).

161

162

163

164

165

166

167  
168  
169  
170  
171  
172  
173  
174

| Variable                         | Modern contraceptive use |               | p-value | AOR              |
|----------------------------------|--------------------------|---------------|---------|------------------|
|                                  | Yes (n=1,445)            | No(n=4,214)   |         |                  |
|                                  | Frequency (%)            | Frequency (%) |         |                  |
| <b>Age</b>                       |                          |               |         |                  |
| 15-24                            | 221(16.5)                | 1,119(83.5)   |         | 1                |
| 25-34                            | 613(27.7)                | 1,603(72.3)   | 0.8     | 0.97(0.78,1.2)   |
| 35-49                            | 611(29.1)                | 1,492(70.9)   | 0.14    | 0.82(0.64,1.1)   |
| <b>Residence</b>                 |                          |               |         |                  |
| Urban                            | 745(32.4)                | 1,557(67.6)   |         | 1                |
| Rural                            | 700(20.9)                | 2,657(79.1)   | 0.06    | 0.85(0.72,1.00)  |
| <b>Religion</b>                  |                          |               |         |                  |
| Muslim                           | 1,414(25.5)              | 4,142(74.5)   |         | 1                |
| Christian                        | 31 (29.7)                | 72 (70.3)     | 0.92    | 0.98 (0.62,1.55) |
| <b>Womens' educational level</b> |                          |               |         |                  |
| No formal education              | 754(21.9)                | 2,690(78.1)   | 0.05    | 0.61(0.37,1.00)  |
| Primary                          | 374(31.8)                | 803(68.2)     | 0.58    | 0.87(0.53,1.42)  |
| Secondary                        | 240(28.0)                | 617(72.0)     | 0.54    | 0.86(0.53,1.40)  |
| Higher                           | 77(42.3)                 | 105(57.7)     |         | 1                |
| <b>Current working status</b>    |                          |               |         |                  |
| Currently working                | 841(30.5)                | 1,913(69.5)   | 0.00    | 1.27 (1.11,1.46) |

|                                      |             |             |       |                  |
|--------------------------------------|-------------|-------------|-------|------------------|
| Currently not working                | 604(20.8)   | 2,301(79.2) |       | 1                |
| <b>Husband education</b>             |             |             |       |                  |
| No formal education                  | 777(21.5)   | 2838(78.5)  |       | 1                |
| Primary education                    | 192(29.9)   | 448(70.1)   | 0.008 | 1.32 (1.07,1.61) |
| Secondary education                  | 192(30.2)   | 443(69.8%)  | 0.19  | 1.16 (0.93,1.45) |
| Higher                               | 151(45.9)   | 179(54.1)   | 0.00  | 1.83 (1.32,2.54) |
| Don't know                           | 134(30.4)   | 306(69.6)   | 0.28  | 1.16 (0.89,1.51) |
| <b>Wealth index</b>                  |             |             |       |                  |
| Poor                                 | 434(18.9)   | 1863(81.1)  |       | 1                |
| Medium                               | 301(27.3)   | 802(72.7)   | 0.00  | 1.37 (1.15,1.63) |
| Rich                                 | 709(31.4)   | 1549(68.6)  | 0.00  | 1.34 (1.11,1.62) |
| <b>Media exposure</b>                |             |             |       |                  |
| Exposed                              | 995(29.5)   | 2,381(70.5) | 0.00  | 1.29 (1.13,1.48) |
| Non exposed                          | 450(19.7)   | 1,833(80.3) |       | 1                |
| <b>Have ANC visits</b>               |             |             |       |                  |
| Yes                                  | 1436(25.8)  | 4,142(74.5) | 0.01  | 2.01 (1.13,3.57) |
| No                                   | 9(10.7)     | 72(89.3)    |       | 1                |
| <b>Ever had terminated pregnancy</b> |             |             |       |                  |
| Yes                                  | 312(26.3)   | 877(73.7)   | 0.41  | 0.94 (0.79,1.09) |
| No                                   | 1,132(25.3) | 3,337(74.7) |       | 1                |
| <b>Number of living children</b>     |             |             |       |                  |
| No children                          | 8(1.1)      | 711(98.9)   | 0.00  | 0.03 (0.01,0.06) |
| 1-2 children                         | 474(24.7)   | 1,448(75.3) | 0.00  | 0.47 (0.38,0.59) |
| 3-4 children                         | 470(31.7)   | 1,014(68.3) | 0.02  | 0.79 (0.67,0.96) |
| ≥5 children                          | 493(32.1)   | 1,041(67.9) |       | 1                |
| <b>Ideal number of children</b>      |             |             |       |                  |
| ≤ 4 children                         | 381(32.0)   | 809(68.0)   |       | 1                |
| ≥ 5 children                         | 854(25.4)   | 2,509(74.6) | 0.001 | 0.73(0.61,0.88)  |
| Non-numeric response                 | 210(19.0)   | 895(81.0)   | 0.00  | 0.52(0.42,0.66)  |
| <b>Desire for more children</b>      |             |             |       |                  |

|                       |           |             |      |                 |
|-----------------------|-----------|-------------|------|-----------------|
| Want's within 2 years | 195(12.2) | 1,407(87.8) |      | 1               |
| Want's after 2 years  | 750(30.6) | 1,700(69.4) | 0.00 | 2.19(1.82,2.64) |
| Want's, unsure timing | 37(11.4)  | 288(88.6)   | 0.49 | 1.13(0.79,1.60) |
| Undecided             | 14(17.4)  | 70(82.6)    | 0.40 | 1.27(0.72,2.24) |
| Doesn't want          | 447(37.4) | 750(62.6)   | 0.00 | 2.35(1.90,2.95) |

175

## 176 **Discussion**

177 This study assessed the prevalence and associated factors of modern contraceptive use among  
 178 Senegalese women. The prevalence of modern contraceptive use was 25.5% with (95% CI (24.4,  
 179 26.7)). Womens' working status, husband education, wealth index, having media exposure,  
 180 having ANC visit, number of living children, ideal number of children and desire for more  
 181 children were factors that have statistically significant association with modern contraceptive  
 182 use.

183 In the present study, the use of modern contraceptives among married Senegalese women was  
 184 25.5% (95% CI (24.4, 26.7)). The result is in harmony with the study conducted in Senegal  
 185 (26.3%) (16). This alignment might be explained by similarities in sociodemographic  
 186 characteristics of the population.

187 The result of the current study is higher than the studies conducted in Bale zone, south East  
 188 Ethiopia (20.8%)(17) and Metekel zone North West Ethiopia (18.6%)(18) . The discrepancy  
 189 might be explained by socio-cultural difference between the countries that could affect their  
 190 awareness on contraceptive use (19). On the other hand the result of the present study is lower  
 191 than studies done in North Showa, Ethiopia (46.9%) (20) Zambia (43% )(21), and Egypt (  
 192 46.5%) (22).

193 In the present study women who are currently enrolled in different jobs (currently working) had  
194 significant association with modern contraceptive use. This result is supported by study  
195 conducted in Ethiopia (19). This could be owing to the fact that women who work and have a  
196 private job have a higher income, greater access to the media, and better health care, all of which  
197 have a beneficial impact on modern contraception use (23–26).

198 In the current study, modern contraceptive use among married Senegalese women was  
199 significantly associated with husband’s educational attainment, which is supported by a study  
200 conducted in Senegal (16,27,28). It's probable that educated husbands are aware of the benefits  
201 of modern contraception since they have a greater chance to read newspapers, watch television,  
202 and use social media. The other factor that had significant association with contraceptive use was  
203 wealth index of a woman. Women from households with a medium or high wealth index were  
204 more likely to use modern contraception than those from households with a low wealth index.  
205 The finding was in line with a study conducted in Ethiopia (29).

206 Modern contraceptive use was also significantly associated with womens’ media exposure. This  
207 outcome is obedient with studies conducted in Senegal (16) and Ethiopia (9). This alignment  
208 could be explained by the fact that media can help communities raise awareness about health  
209 issues as well as address social and cultural issues (30,31). This critical role of the media can aid  
210 in lowering barriers to health-care access and use, including contraception.

211 In this study presence of ANC visits have significant association with modern contraceptive use.  
212 The result is supported by a multicenter study done in African countries (8). It's possible that the  
213 increased prevalence of contraceptive use among women who had ANC visits is due to the fact  
214 that antenatal care provides a unique opportunity to interact with, educate, and provide family

215 support to women of all socioeconomic backgrounds, which facilitates the uptake of modern  
216 contraceptives. The study also showed that women who hadn't child have lower tendency to use  
217 modern contraceptives than women who had three and more than three children. This result is  
218 supported by studies done in Senegal (16,32). This meant that the more children a woman has,  
219 the more likely she is to want to space or limit the number of children, and the more  
220 contraceptive she is likely to use.

221 Furthermore, the present study also revealed the presence of statistically significant association  
222 between modern contraceptive use, and womens' perception for ideal number of children they  
223 would have. The result is in harmony with a study done in Senegal (16). According to the study,  
224 women who wished five or more children had a lower likelihood of taking modern contraception  
225 than women who desired four or fewer children. Finally, the results of the current study also  
226 showed that womens' desire for more children also affects womens' modern contraceptive  
227 utilization. That is the odds of using modern contraceptives among women who wants child  
228 within 2 years lower than women who wants child after 2 years and totally doesn't want a child  
229 at all.

230 The study's main strength was the use of nationally representative data and a large sample size,  
231 which increased the generalizability of its conclusions. The DHS study, on the other hand, has  
232 flaws in that it relies on respondents' self-reporting and may be prone to recall bias because  
233 women were asked to recall past incidents. Furthermore, the design of this study limits its ability  
234 to demonstrate causation between the desired outcome and these critical independent factors.

## 235 **Conclusion and recommendation**

236 According to the findings, the usage of modern contraceptive methods among married women in  
237 Senegal was low. Women's contraceptive use was affected by family planning messages  
238 exposure, sociodemographic, and obstetric factors. Thus, a tailored behavior change intervention  
239 is required to increase contraceptive utilization among married women in Senegal and such  
240 interventions should take those factors into account.

#### 241 **Ethics approval and consent to participate**

242 The study is based on DHS data which was collected by DHS program, the DHS program collect  
243 the data by gaining ethical approval from national IRB. Thus, we didn't received any ethical  
244 approval since the data used for the study is from a secondary source. However, we got the  
245 authentication letter from the DHS program to use the data set for this study. The study was  
246 conducted under the Declaration of Helsinki.

#### 247 **Consent for publication**

248 Not applicable.

#### 249 **Availability of data and materials**

250 All result-based data are available within the manuscript and anyone can access the data set  
251 online from [www.measuredhs.com](http://www.measuredhs.com)

#### 252 **Competing interests**

253 The authors declare that they have no competing interests.

#### 254 **Funding**

255 No, any funding was received from any organization.

#### 256 **Authors' contributions**



257 All authors made substantial contributions to conception, acquisition of data, or analysis and  
258 interpretation of data; took part in drafting the article or revising it critically for important  
259 intellectual content; agreed to submit to the current journal; gave final approval of the version to  
260 be published; and agree to be accountable for all aspects of the work.

## 261 **Acknowledgments**

262 We would like to acknowledge the MEASURE DHS program for permitting us to obtain and use  
263 DHS data sets of Senegal.

264

265

266

267

268

269

270

271

## 272 **Reference**

273 1. Contraceptive prevalence – use of modern methods (%)(Health Equity Monitor)  
274 [Internet]. Available from: [https://www.who.int/data/gho/indicator-metadata-registry/imr-](https://www.who.int/data/gho/indicator-metadata-registry/imr-details/3334)  
275 [details/3334](https://www.who.int/data/gho/indicator-metadata-registry/imr-details/3334)

- 276 2. Akintade OL, Pengpid S, Peltzer K. Awareness and use of and barriers to family planning  
277 services among female university students in Lesotho. *S Afr J Obstet Gynaecol.*  
278 2011;17(3):72–8.
- 279 3. UNDESA. World Family Planning 2017 Highlights. *Econ Soc Aff [Internet].* 2017;1–43.  
280 Available from:  
281 [https://www.un.org/en/development/desa/population/publications/pdf/family/WFP2017\\_H](https://www.un.org/en/development/desa/population/publications/pdf/family/WFP2017_Highlights.pdf)  
282 [ighlights.pdf](https://www.un.org/en/development/desa/population/publications/pdf/family/WFP2017_Highlights.pdf)
- 283 4. United Nations (UN). Sustainable Development Goals (SDG 5) | United Nations Western  
284 Europe [Internet]. United Nations. 2020. Available from: [https://unric.org/en/sdg-](https://unric.org/en/sdg-12/%0Ahttps://unric.org/en/sdg-5/)  
285 [12/%0Ahttps://unric.org/en/sdg-5/](https://unric.org/en/sdg-5/)
- 286 5. Ahmed S, Li Q, Liu L, Tsui AO. Maternal deaths averted by contraceptive use: An  
287 analysis of 172 countries. *Lancet [Internet].* 2012;380(9837):111–25. Available from:  
288 [http://dx.doi.org/10.1016/S0140-6736\(12\)60478-4](http://dx.doi.org/10.1016/S0140-6736(12)60478-4)
- 289 6. WHO. WHO recommendations on self-care interventions. *Human Reproduction*  
290 *Programme.* 2020.
- 291 7. Darroch JE. Adding it up: Investing in Contraception and Maternal and Newborn Health  
292 for Adolescents in Ethiopia , 2018. Guttmacher Institute. 2018.
- 293 8. Apanga PA, Kumbeni MT, Ayamga EA, Ulanja MB, Akparibo R. Prevalence and factors  
294 associated with modern contraceptive use among women of reproductive age in 20  
295 African countries: A large population-based study. *BMJ Open.* 2020;10(9).
- 296 9. Asresie MB, Fekadu GA, Dagnaw GW, Gelaw YM. Modern Contraceptive Use and

- 297 Influencing Factors in Amhara Regional State: Further Analysis of Ethiopian  
298 Demographic Health Survey Data 2016. *Adv Public Heal.* 2020;2020(Mc).
- 299 10. Antarini A. Factors influencing the use of modern contraception among reproductive aged  
300 women in bangka belitung province, indonesia. *Pan Afr Med J.* 2021;39.
- 301 11. Kwabena E, Id A, Budu E, Sambah F, Baatiema L, Appiah F, et al. Prevalence and  
302 determinants of unintended pregnancy in sub-Saharan Africa: A multi- country analysis of  
303 demographic and health surveys. *PLoS One.* 2019;14(8):1–16.
- 304 12. Abortion in Senegal \_ Guttmacher Institute [Internet]. Available from:  
305 <https://www.guttmacher.org/fact-sheet/abortion-senegal>
- 306 13. Senegal - Republic of Senegal - Western Africa [Internet]. Available from:  
307 <https://www.nationsonline.org/oneworld/senegal.htm>
- 308 14. senegal-population @ worldpopulationreview.com [Internet]. Available from:  
309 <https://worldpopulationreview.com/countries/senegal-population>
- 310 15. Choueiry G. What is an Acceptable Value for VIF? (With References) – Quantifying  
311 Health [Internet]. 2020. Available from: <https://quantifyinghealth.com/vif-threshold/>
- 312 16. Zegeye B, Ahinkorah BO, Idriss-Wheeler D, Olorunsaiye CZ, Adjei NK, Yaya S. Modern  
313 contraceptive utilization and its associated factors among married women in Senegal: a  
314 multilevel analysis. *BMC Public Health.* 2021;21(1):1–13.
- 315 17. Belda SS, Haile MT, Melku AT, Tololu AK. Modern contraceptive utilization and  
316 associated factors among married pastoralist women in Bale eco-region, Bale Zone, South  
317 East Ethiopia. *BMC Health Serv Res.* 2017;17(1):1–12.

- 318 18. Adane AA, Bekele YA, Melese E, Worku GT, Netsere HB. Modern Contraceptive  
319 Utilization and Associated Factors among Married Gumuz Women in Metekel Zone North  
320 West Ethiopia. *Biomed Res Int.* 2020;2020.
- 321 19. Gebre MN, Edossa ZK. Modern contraceptive utilization and associated factors among  
322 reproductive-age women in Ethiopia: Evidence from 2016 Ethiopia demographic and  
323 health survey. *BMC Womens Health.* 2020;20(1):1–14.
- 324 20. A. M, D. W, A. F, B. M. Determinants of modern contraceptive utilization among married  
325 women of reproductive age group in North Shoa Zone, Amhara Region, Ethiopia. *Reprod*  
326 *Health* [Internet]. 2014;11(1):1–7. Available from:  
327 [http://ovidsp.ovid.com/ovidweb.cgi?T=JS&PAGE=reference&D=emed12&NEWS=N&A](http://ovidsp.ovid.com/ovidweb.cgi?T=JS&PAGE=reference&D=emed12&NEWS=N&AN=2014111648)  
328 [N=2014111648](http://ovidsp.ovid.com/ovidweb.cgi?T=JS&PAGE=reference&D=emed12&NEWS=N&AN=2014111648)
- 329 21. Lasong J, Zhang Y, Gebremedhin SA, Opoku S, Abaidoo CS, Mkandawire T, et al.  
330 Determinants of modern contraceptive use among married women of reproductive age: A  
331 cross-sectional study in rural Zambia. *BMJ Open.* 2020;10(3):1–10.
- 332 22. Unit FH. Practice of Family Planning among Married Female Attendants to Shawa Family  
333 Health Unit, Dakahlia, Egypt. *Egypt Fam Med J.* 2020;4(1):24–41.
- 334 23. Tekelab T, Melka AS, Wirtu D. Predictors of modern contraceptive methods use among  
335 married women of reproductive age groups in Western Ethiopia: A community based  
336 cross-sectional study. *BMC Womens Health* [Internet]. 2015;15(1):1–8. Available from:  
337 <http://dx.doi.org/10.1186/s12905-015-0208-z>
- 338 24. Ofonime JE. Determinants of modern contraceptive uptake among Nigerian women:

- 339 Evidence from the national demographic and health survey. *Afr J Reprod Health*  
340 [Internet]. 2017;21(3):89–95. Available from:  
341 [https://www.scopus.com/inward/record.uri?eid=2-s2.0-](https://www.scopus.com/inward/record.uri?eid=2-s2.0-85038842247&partnerID=40&md5=c36f097c56e5413d445dcaaf7d7a30a1)  
342 [85038842247&partnerID=40&md5=c36f097c56e5413d445dcaaf7d7a30a1](https://www.scopus.com/inward/record.uri?eid=2-s2.0-85038842247&partnerID=40&md5=c36f097c56e5413d445dcaaf7d7a30a1)
- 343 25. Osmani AK, Reyer JA, Osmani AR, Hamajima N. Factors influencing contraceptive use  
344 among women in Afghanistan: Secondary analysis of Afghanistan Health Survey 2012.  
345 *Nagoya J Med Sci.* 2015;77(4):551–61.
- 346 26. Islam AZ, Mondal NI, Khatun ML. Prevalence and Determinants of Contraceptive use  
347 among Employed and Unemployed Women in Bangladesh. 2016;5(2):92–102.
- 348 27. Tessema ZT, Teshale AB, Tesema GA, Yeshaw Y, Worku MG. Pooled prevalence and  
349 determinants of modern contraceptive utilization in East Africa: A Multi-country Analysis  
350 of recent Demographic and Health Surveys. *PLoS One* [Internet]. 2021;16(3 March):1–16.  
351 Available from: <http://dx.doi.org/10.1371/journal.pone.0247992>
- 352 28. Gebremariam A. Modern Contraceptive Method Mix and Factors Affecting Utilization of  
353 Modern Contraceptives among Married Women in Adigrat Town, Tigray, Northern  
354 Ethiopia. *Fam Med Med Sci Res.* 2014;03(04).
- 355 29. Lakew Y, Reda AA, Tamene H, Benedict S, Deribe K. Geographical variation and factors  
356 influencing modern contraceptive use among married women in Ethiopia: evidence from a  
357 national population based survey. *Reprod Health.* 2013;1–10.
- 358 30. Ayanore MA, Pavlova M, Groot W. Unmet reproductive health needs among women in  
359 some West African countries: A systematic review of outcome measures and

360 determinants. *Reprod Health* [Internet]. 2016;13(1):1–10. Available from:  
361 <http://dx.doi.org/10.1186/s12978-015-0104-x>

362 31. Ansary R, Anisujjaman M. Factors Determining Pattern of Unmet Need for Family  
363 Planning in. *Int Res J Soc Sci*. 2012;1(4):16–23.

364 32. Bulto GA, Zewdie TA, Beyen TK. Demand for long acting and permanent contraceptive  
365 methods and associated factors among married women of reproductive age group in Debre  
366 Markos Town, North West Ethiopia. *BMC Womens Health*. 2014;14(1).

367
